# Supplementary material for: Synthesis of asymmetric imine polymers for highly selective sorting of semiconducting single-walled carbon nanotubes by a two-in-one strategy
Source: Royal Society of Chemistry journal article supplement (doi:10.1039/d4py00607k), 2024-01-01
Supplement: d4py00607k1.pdf [file d4py00607k1.pdf]

*Supporting information*

**Synthesis of Asymmetric Imine Polymers for Highly Selective Sorting  
of Semiconducting Single-Walled Carbon Nanotubes by Two in One  
Strategy**

Ying Zhang,<sup>\*ab</sup> Yu Li,<sup>a</sup> Yuchi Wan,<sup>a</sup> Jun-Hao Wang,<sup>\*c</sup> Yunzhen Chang,<sup>a</sup> Sheng Zhu,<sup>ab</sup> Lan Bai,<sup>b</sup>  
Yu Cao,<sup>b</sup> Xuelei Liang<sup>b</sup> Gaoyi Han <sup>\*ab</sup>

<sup>a</sup>*Institute of Molecular Science, Shanxi University, Key Laboratory of Energy Conversion and Storage of Shanxi Province, Key Laboratory of Chemical Biology and Molecular Engineering of Education Ministry, Shanxi University, Taiyuan 030006, P. R. China E-mail: yzhang@sxu.edu.cn, han\_gaoyis@sxu.edu.cn*

<sup>b</sup>*Institute for Carbon-Based Thin Film Electronics, Peking University-Shanxi (ICTFE-PKU), Taiyuan 030012, China P. R. China.*

<sup>c</sup>*Institute of Crystalline Materials, Shanxi University, Taiyuan 030006, P. R. China jhwang@sxu.edu.cn*

### ***Polymer @SWCNTs dispersion preparation***

In order to investigate the separation efficiency of synthesized polymers at various polymer/SWCNTs ratios, we should prepare the polymer@SWCNTs dispersion. The amounts of polymer ranging from 1 mg to 6 mg were dissolved in 6 mL of toluene, followed by complete dissolution through bath sonication. Then, 1 mg of SWCNTs was added, followed by sonication in a bath for 40 min at 480 W. Subsequently, the mixture was transferred to a 10 mL centrifuge tube and centrifuged at 15 °C for 30 minutes at a speed of 15300 rpm (19800g). After centrifugation, we collected 80% of the supernatant to obtain stable dispersion of polymer@SWCNTs for UV-Vis-NIR spectroscopy. To compare the selective separation ability of polymers for HiPCO-SWCNTs and Arc-SWCNTs, we prepared dispersions of PFO@SWCNTs and PCz@SWCNTs using commercially purchased polymers PFO and PCz, respectively, as well as a dispersion of SWCNTs in NMP for comparison.

### ***Bare SWCNTs preparation***

The polymer@s-SWCNTs dispersion was filtered through a nylon membrane with a 0.22  $\mu\text{m}$  pore size. Subsequently, it is washed repeatedly with 10 mL of toluene and 10 mL of tetrahydrofuran (THF) solution, with black substance left on the filter membrane. The membrane with the black substance is then soaked in 2 mL of toluene solution and subjected to 10 minutes of ultrasonication. Afterward, the membrane is removed, and 0.3% trifluoroacetic acid (TFA) is added, followed by ultrasonication for another 10 minutes. The mixture is then centrifuged at 10000 rpm (9850g) for 10 minutes for collecting the precipitate. After washing repeatedly by toluene, the precipitate was then put in 2 mL of dichloromethane (DCM). The suspension of SWCNTs in DCM was then dropped onto a 1 cm $\times$ 1 cm silicon wafer for Raman and XPS testing.

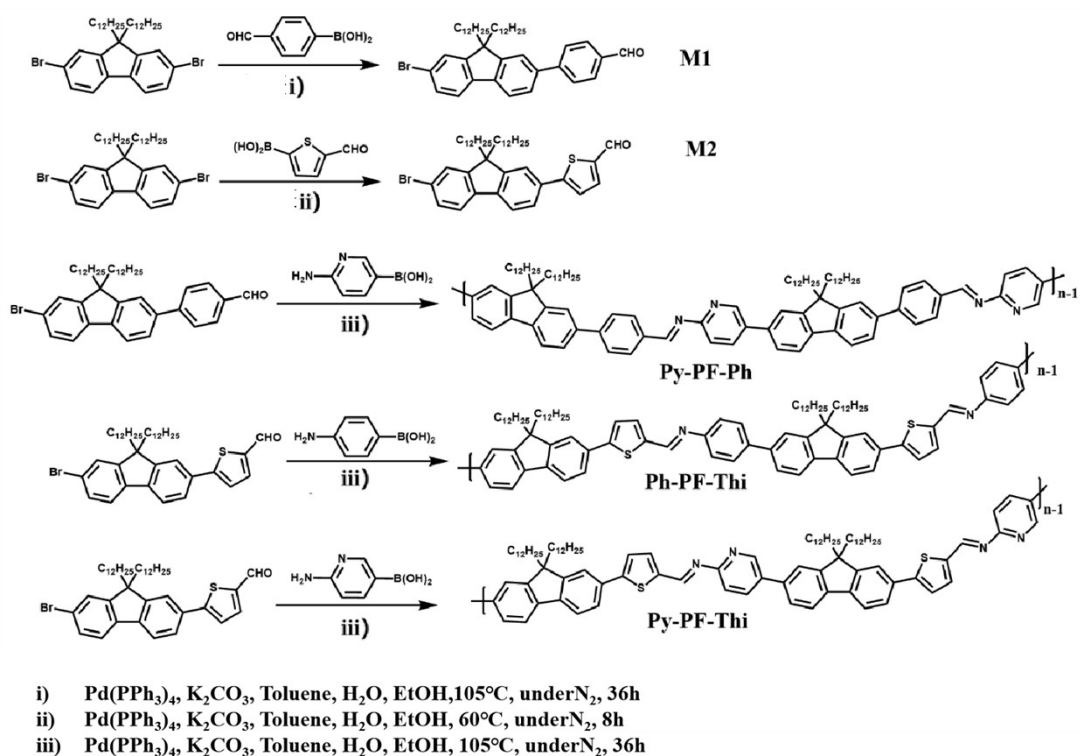

**Fig. S1** Chemical structure and synthetic route for M1, M2, P1, P2 and P3 in this work.

**Table S1** Number-average molecular weight ( $M_n$ ), weight-average molecular weight ( $M_w$ ), polydispersity index (PDI), HOMO energy level (eV), LUMO energy level (eV), energy band gap (eV) and maximum absorption peak positions of polymers<sup>c</sup>

| Polymer        | $M_n$<br>(KDa) <sup>a</sup> | $M_w$<br>(KDa) <sup>a</sup> | PDI<br>( $M_w/M_n$ ) <sup>a</sup> | HOMO<br>(eV) <sup>b</sup> | LUMO<br>(eV) <sup>b</sup> | Gap<br>(eV) <sup>b</sup> | $\lambda_{\text{max}}$<br>(nm) <sup>c</sup> |
|----------------|-----------------------------|-----------------------------|-----------------------------------|---------------------------|---------------------------|--------------------------|---------------------------------------------|
| Py-PF-Ph (P1)  | 8.2                         | 10.2                        | 1.24                              | -5.45                     | -2.08                     | 3.37                     | 396                                         |
| Ph-PF-Thi (P2) | 8.6                         | 15.2                        | 1.77                              | -5.18                     | -2.15                     | 3.03                     | 427                                         |
| Py-PF-Thi (P3) | 3.2                         | 11.3                        | 3.54                              | -5.30                     | -2.31                     | 2.99                     | 438                                         |

<sup>a</sup> obtained by GPC;

<sup>b</sup> obtained by Gauss calculation;

<sup>c</sup> obtained by UV absorption spectrum.

**Table S2 The s-SWCNTs sorted by our work and the reported polymers**

| Polymer         | M11 valley <sup>a</sup> | Sonication<br>(power and time)                                      | Centrifugation<br>(speed and<br>time) | s-SWCNTs<br>Purity <sup>b</sup> | Ref                                                                                    |
|-----------------|-------------------------|---------------------------------------------------------------------|---------------------------------------|---------------------------------|----------------------------------------------------------------------------------------|
| <b>P1</b>       | deeper                  | Bath sonication<br>40min                                            | 19800g<br>0.5 h                       | -                               | This work                                                                              |
| <b>Pcz</b>      | deeper                  | top-tip dispergator<br>45% amplitude 20 min<br>30% amplitude 15 min | 60000g<br>2h                          | 99.9%                           | Nano Research,<br><b>2021</b> , <i>14</i> , 4281.                                      |
| <b>Pcz</b>      | deeper                  | top-tip dispergator<br>30% amplitude 30min                          | 20000g<br>1h                          | 99.9%                           | Small, <b>2016</b> ,<br><i>12</i> , 4993.                                              |
| <b>PF-PD</b>    | deeper                  | top-tip dispergator<br>50% amplitude 30min                          | 22000g<br>0.5h                        | 99.7%                           | Journal of the<br>American<br>Chemical<br>Society, <b>2016</b> ,<br><i>138</i> , 802.  |
| <b>Polymer1</b> | deeper                  | top-tip dispergator                                                 | 22000 g<br>0.5 h                      | -                               | Journal of the<br>American<br>Chemical<br>Society, <b>2015</b> ,<br><i>137</i> , 4328. |
| <b>Polymer1</b> | -                       | top-tip dispergator<br>30% amplitude                                | 22000 g<br>45 min                     | 99.7%                           | ACS Nano,<br><b>2017</b> , <i>11</i> , 5660.                                           |
| <b>PFODA</b>    | -                       | top-tip dispergator<br>50% amplitude 30min                          | 22000 g<br>0.5 h                      | 99.6%                           | Small, <b>2024</b> ,<br>2403651.                                                       |

<sup>a</sup> compared with commercial products from NanoIntegris (99.9%)

<sup>b</sup> measured from electrical device fabricated by the sorted s-SWCNTs

**Table S3** Relationship between different chiral carbon nanotubes and chiral angle, diameter, excitation spectrum, emission spectrum

| (n,m)  | Chiral angle | Diameter(nm) | Emission wavelength | Excitation wavelength |
|--------|--------------|--------------|---------------------|-----------------------|
| (6,5)  | 26.996       | 0.757        | 983.935             | 569.171               |
| (7,5)  | 24.504       | 0.829        | 1025.534            | 647.348               |
| (7,6)  | 27.457       | 0.895        | 1126.805            | 650.870               |
| (8,3)  | 15.295       | 0.782        | 952.058             | 661.976               |
| (8,4)  | 19.107       | 0.840        | 1117.889            | 590.239               |
| (8,6)  | 25.285       | 0.966        | 1174.465            | 721.185               |
| (8,7)  | 27.796       | 1.032        | 1267.000            | 728.000               |
| (9,2)  | 9.826        | 0.806        | 1126.195            | 547.894               |
| (9,4)  | 17.480       | 0.916        | 1100.832            | 725.014               |
| (9,5)  | 20.633       | 0.976        | 1251.021            | 674.765               |
| (9,7)  | 25.872       | 1.103        | 1323.000            | 790.000               |
| (9,8)  | 28.055       | 1.170        | 1399.852            | 826.305               |
| (10,2) | 8.948        | 0.884        | 1051.934            | 735.636               |
| (10,5) | 19.107       | 1.050        | 1249.174            | 793.195               |
| (10,6) | 21.787       | 1.111        | 1388.013            | 757.856               |
| (11,1) | 4.307        | 0.916        | 1251.534            | 607.382               |
| (11,3) | 11.742       | 1.014        | 1195.457            | 797.310               |
| (12,4) | 13.898       | 1.145        | 1340.252            | 863.132               |

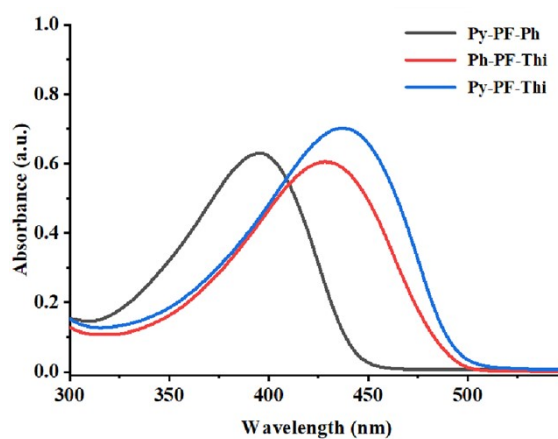

**Fig. S2** UV absorption spectra of polymers Py-PF-Ph, Ph-PF-Thi and Py-PF-Thi in toluene.

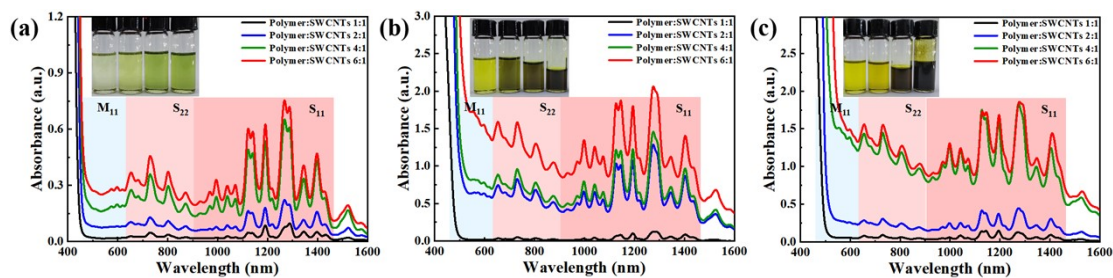

**Fig. S3** UV-Vis-NIR absorption spectra of (a) Py-PF-Ph (P1), (b) Ph-PF-Thi (P2) and (c) Py-PF-Thi (P3) dispersed HiPCO-SWCNTs in different proportions and the carbon tube concentration is 0.16 mg/mL.

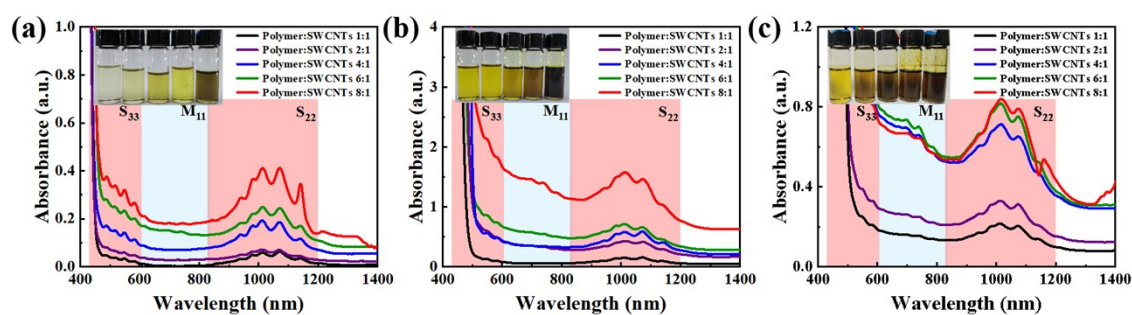

**Fig. S4** UV-Vis-NIR absorption spectra of (a) Py-PF-Ph (P1), (b) Ph-PF-Thi (P2) and (c) Py-PF-Thi (P3) dispersed Arc-SWCNTs in different proportions and the carbon tube concentration is 0.16mg/mL.

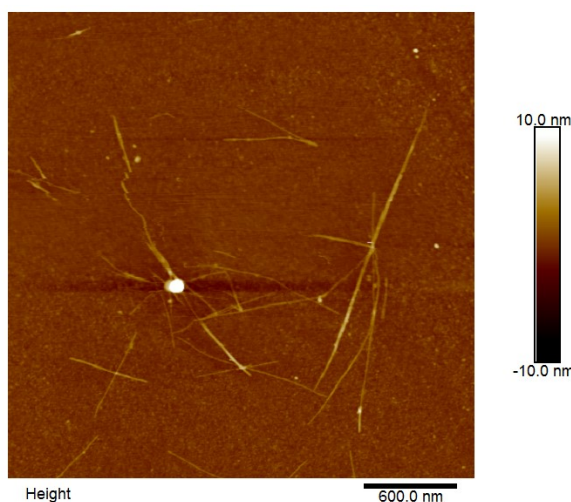

**Fig. S5** AFM image of Py-PF-Ph (P1) dispersed s-SWCNTs on silicon wafer.

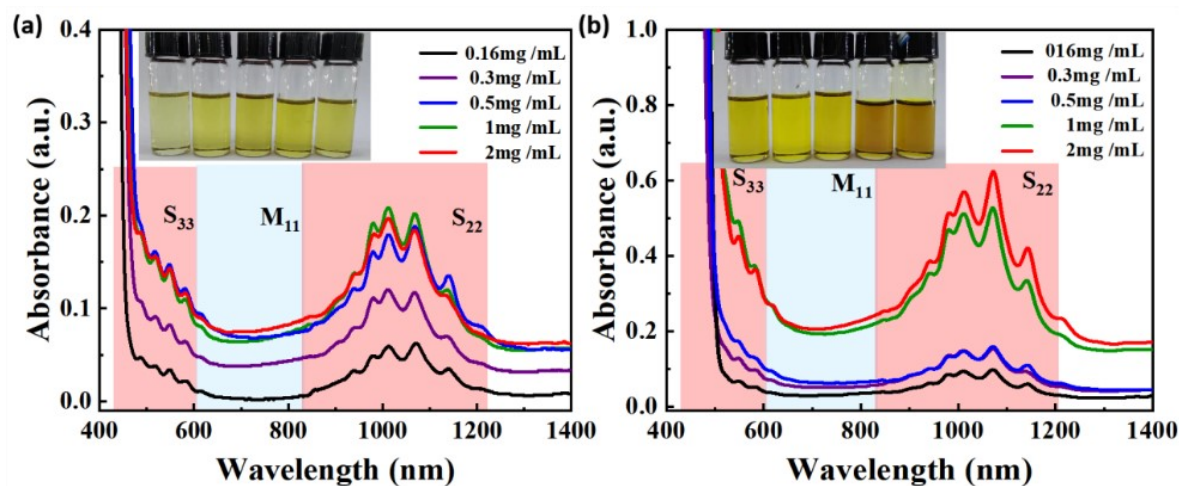

**Fig. S6** UV-Vis-NIR absorption spectra of (a) Py-PF-Ph (P1) and (b) Ph-PF-Thi (P2) dispersed Arc-SWCNTs with different concentrations from 0.16 to 2 mg/mL. The ratio of polymer to Arc-SWCNTs is 1:1.

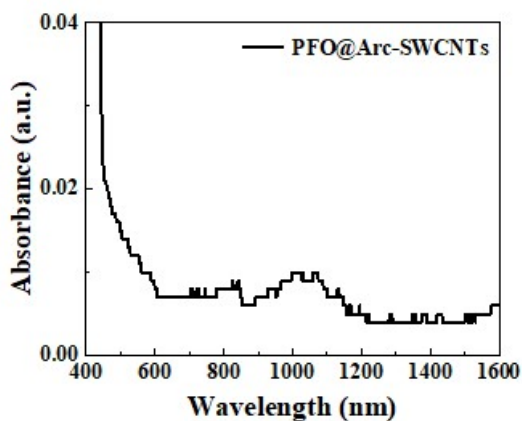

**Fig. S7** UV-Vis-NIR absorption spectra of PFO (M<sub>w</sub>: 5W) dispersed Arc-SWCNTs with concentration of 0.16 mg/mL. The ratio of polymer to Arc-SWCNTs is 1:1.

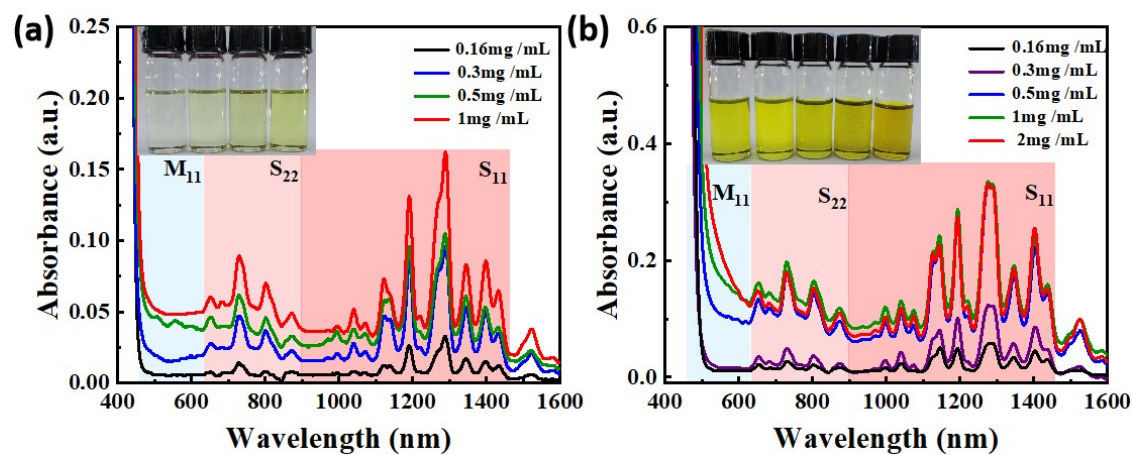

**Fig. S8** UV-Vis-NIR absorption spectra of (a) Py-PF-Ph (P1) and (b) Ph-PF-Thi (P2) dispersed HiPCO-SWCNTs with different concentrations from 0.16 to 2 mg/mL. The ratio of polymer to HiPCO-SWCNTs is 1:1.



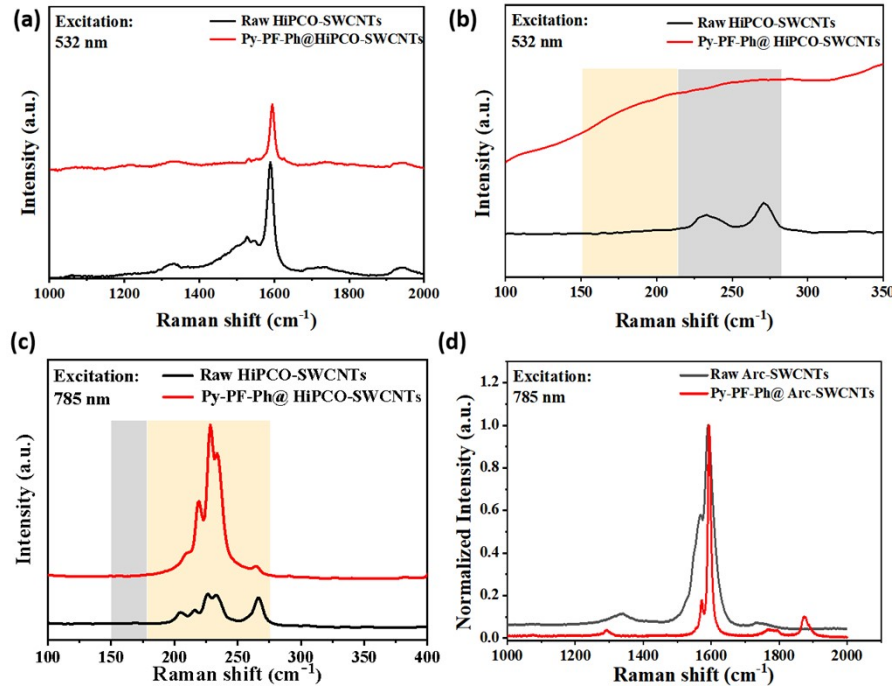

**Fig. S9** (a) The G-band region of the Py-PF-Ph purified HiPCO-SWCNTs at an excitation wavelength of 532 nm. (b-c) The RBM region of Raman spectrum at laser wavelengths of 532 nm, and 785 nm, with the gray region representing the metallic type and the yellow region representing the semiconductor type SWCNTs. (d) The normalized G-band region of the Raman spectrum at the excitation wavelength of 785 nm.

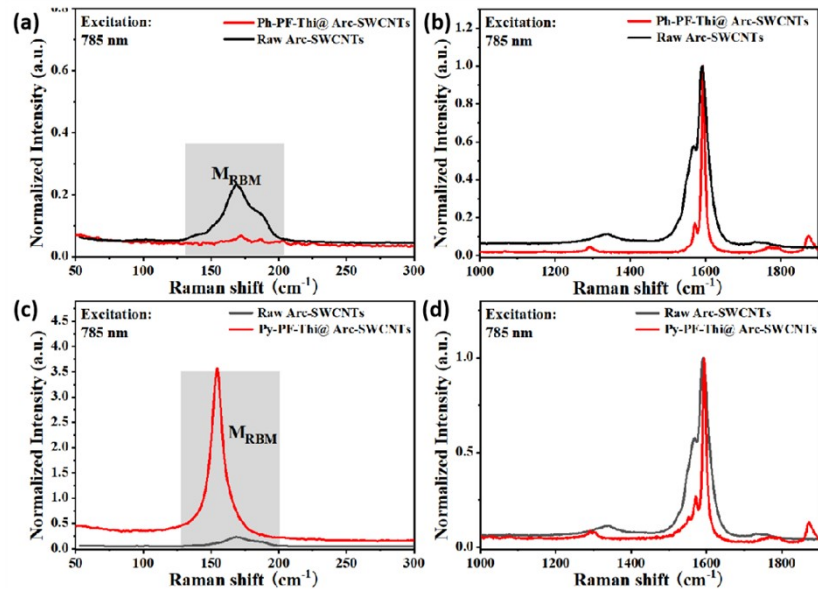

**Fig. S10** (a) (c) RBM region of Raman spectrum for Ph-PF-Thi and Py-PF-Thi separated Arc-SWCNTs using 785 nm excitation wavelength. The gray area indicates the signal position of metallic SWCNTs. (b) (d) The normalized G-band region of the Raman spectrum for Ph-PF-Thi and Py-PF-Thi separated Arc-SWCNTs excited under laser wavelength of 785 nm.



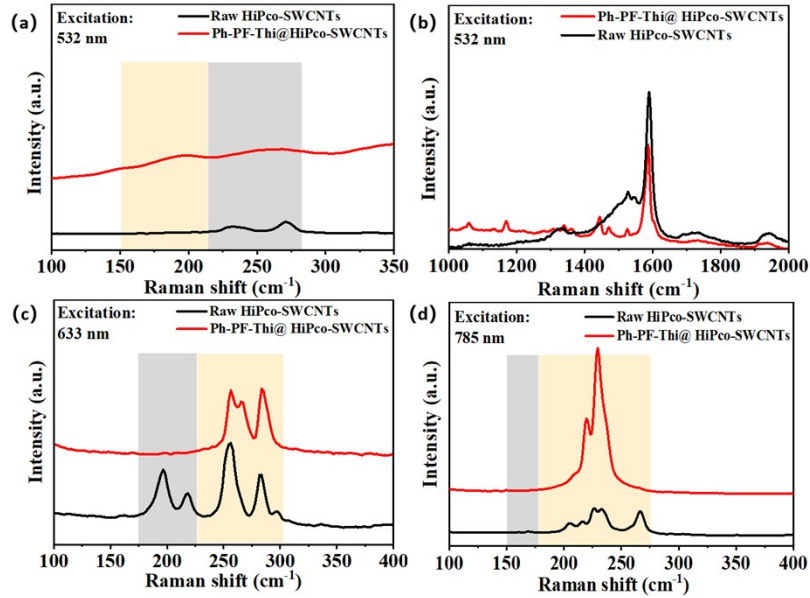

**Fig. S11** The RBM region of Raman spectrum excited under laser wavelengths of (a) 532 nm (b) 633 nm and (c) 785 nm of the raw HiPCO-SWCNTs and Ph-PF-Thi purified HiPCO-SWCNTs. (b) the G-band region of Raman spectrum of the Ph-PF-Thi purified SWCNTs under the laser excitation wavelength of 532 nm. The gray region represents the metal type and the yellow region represents the semi conducting type SWCNTs, respectively.

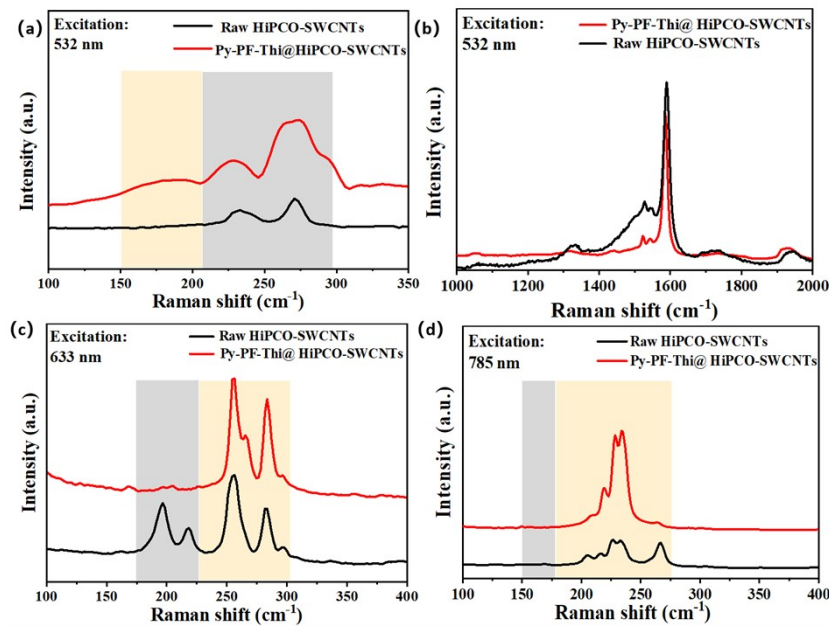

**Fig. S12** The RBM region of Raman spectrum excited under laser wavelengths of (a) 532 nm (b) 633 nm and (c) 785 nm of the raw HiPCO-SWCNTs and Py-PF-Thi purified HiPCO-SWCNTs. (b) the G-band region of Raman spectrum of the Py-PF-Thi purified SWCNTs under the laser excitation wavelength of 532 nm. The gray region represents the metal type and the yellow region represents the semi conducting type SWCNTs, respectively.

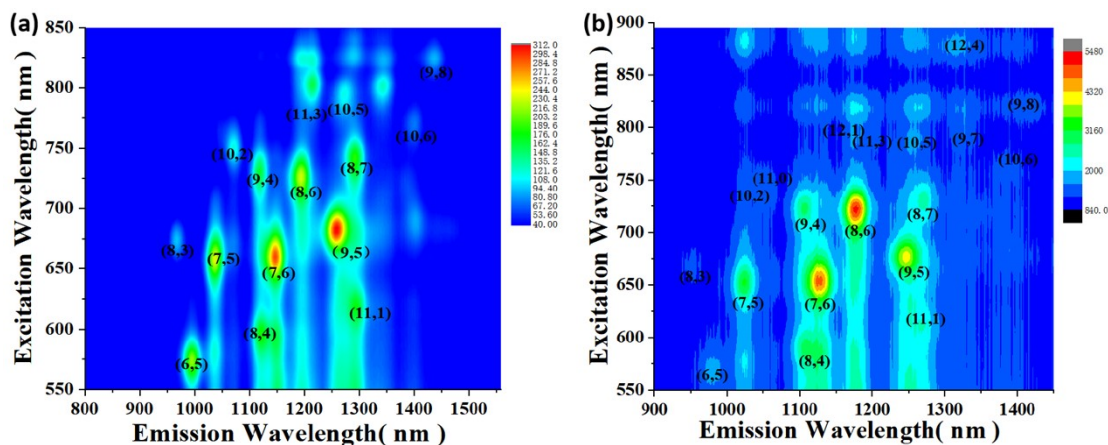

**Fig. S13** The photoluminescence excitation spectra (PLE) of the polymers (a)Ph-PF-Thi (P2) and (b)Py-PF-Thi (P3) @HiPCO-SWCNTs 1:1 at a concentration of 0.17 mg/mL in toluene solution.

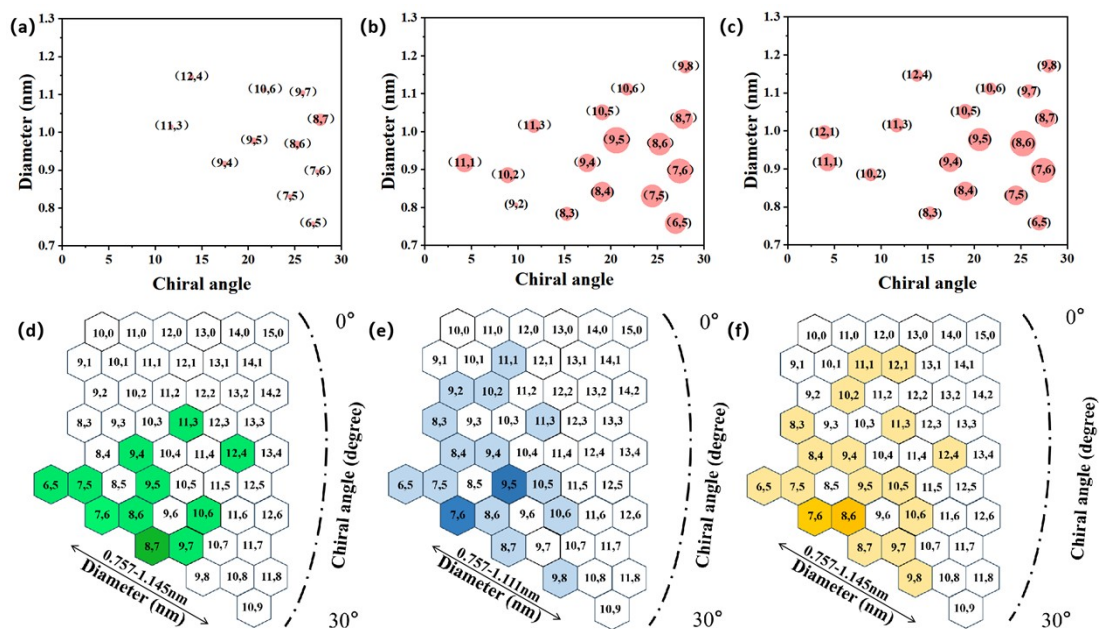

**Fig. S14** The relationship between chiral angle and diameter, and the chiral diagram of P1, P2 and P3 @HiPCO-SWCNTs. The larger red circle in figure (a-c) and the darker hexagon color in figure (d-f) indicate that the luminous intensity of s-SWCNTs species is relatively strong which is proportional to the concentration.

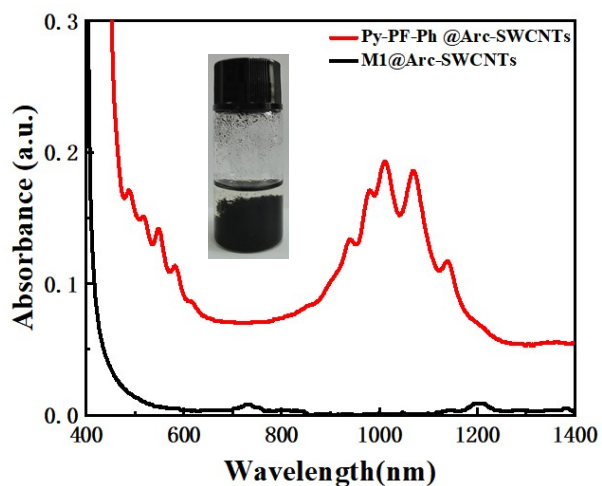

**Fig. S15** Absorption spectra of M1@SWCNTs and P1@SWCNTs. The inset picture indicates the poor dispersion of M1 towards the raw SWCNTs.

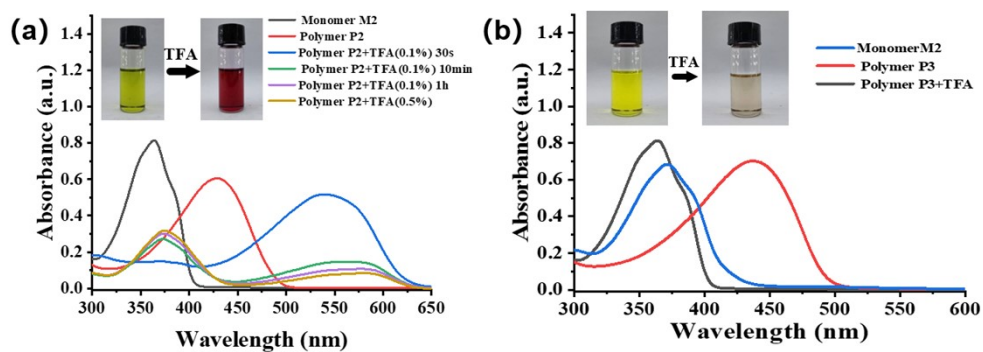

**Fig. S16** Absorption spectra of polymers (a) P2 and (b) P3 before and after acid addition.

**$^1\text{H}$  NMR spectra of all compounds in this paper.**

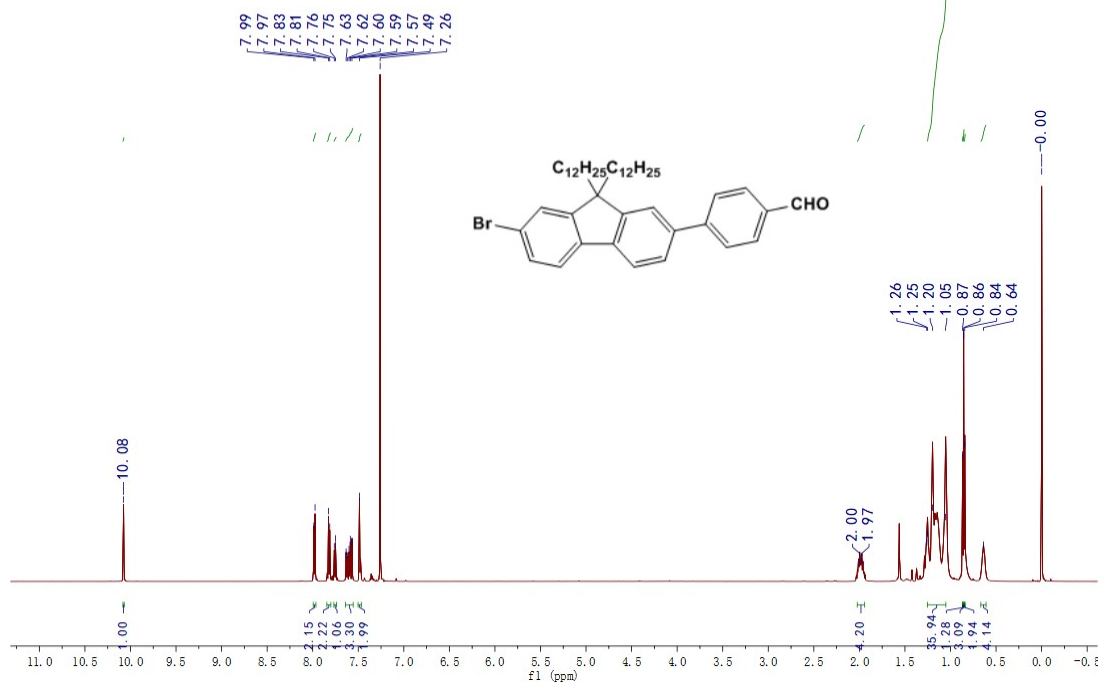

**$^1\text{H}$  NMR of M1**

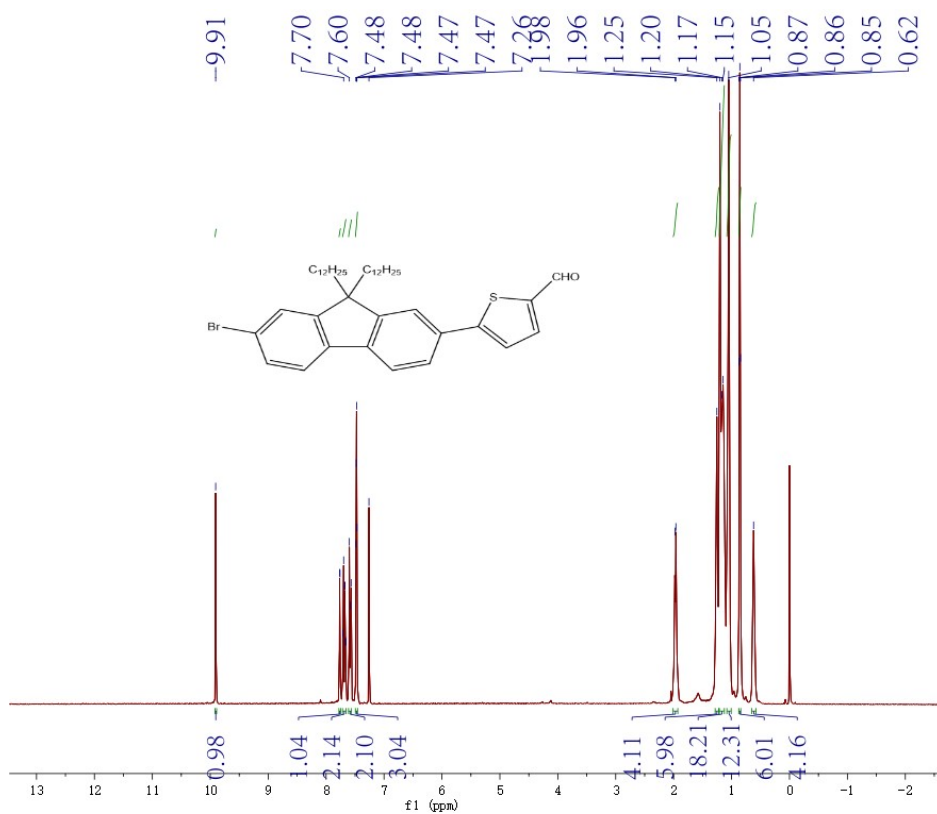

**$^1\text{H}$  NMR of M2**

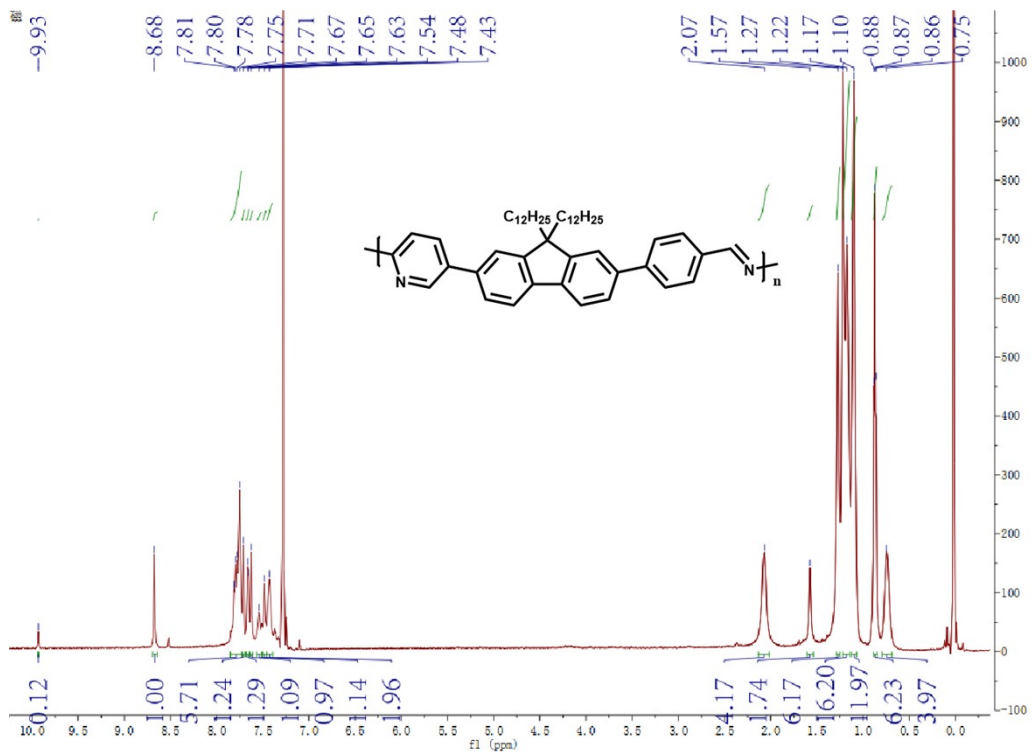

**<sup>1</sup>H NMR of P1**

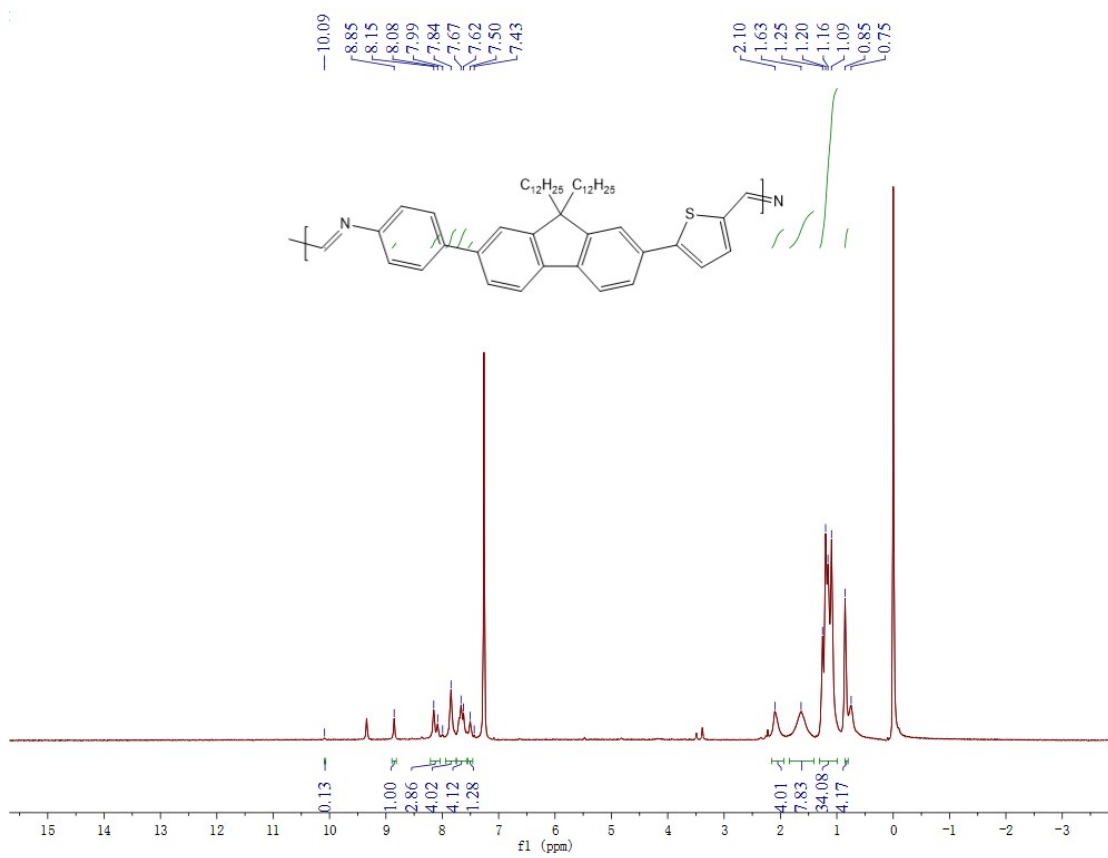

**<sup>1</sup>H NMR of P2**

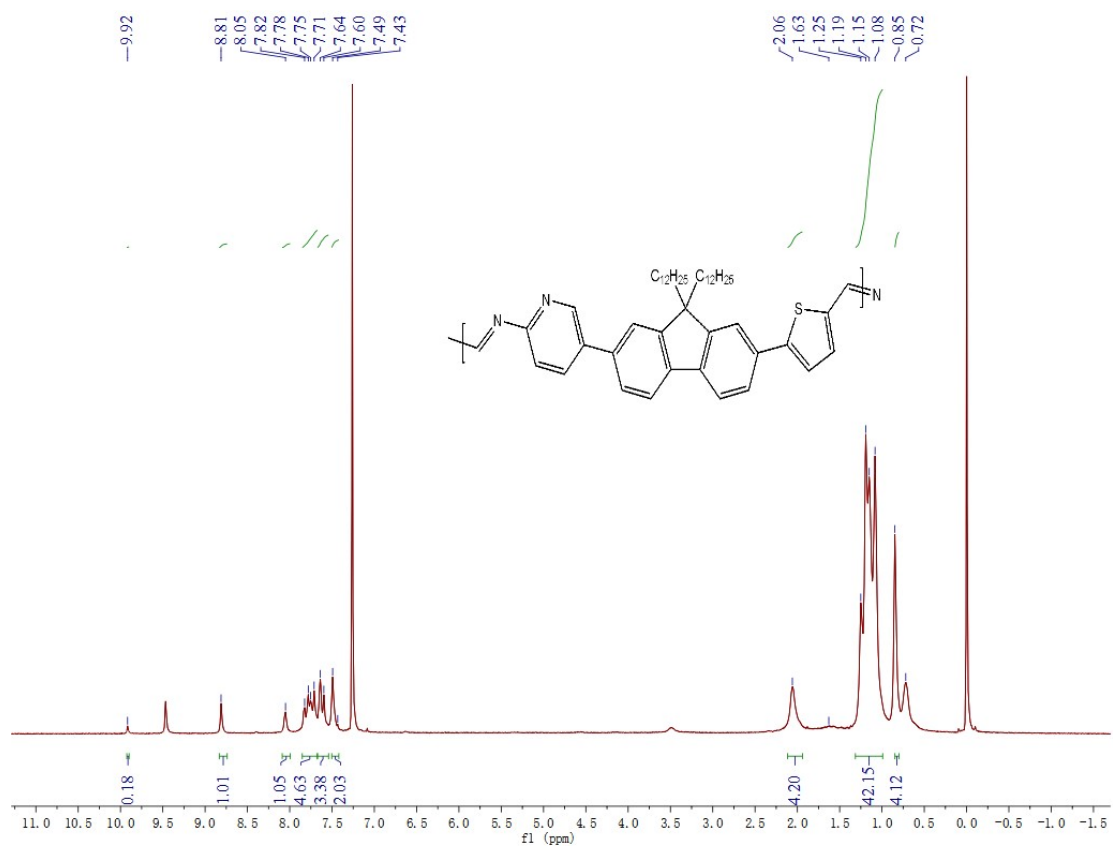

**$^1\text{H}$  NMR of P3**
